# Supplementary material
Source: Springer Nature journal article supplement (https://www.springermedizin.de/resource/supplementary/12967_2009_383_MOESM5_ESM.pdf/9576352)

**A****Donor 14 (HLA-A\*2402/3303)**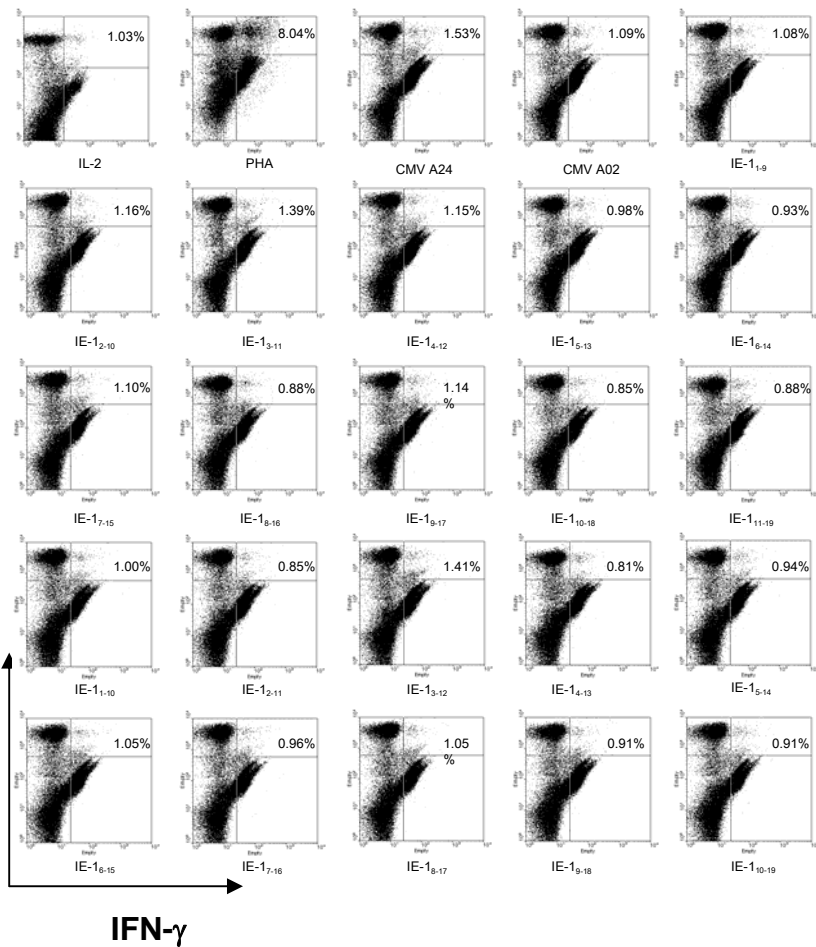**B****Donor 14 (HLA-A\*2402/3303)**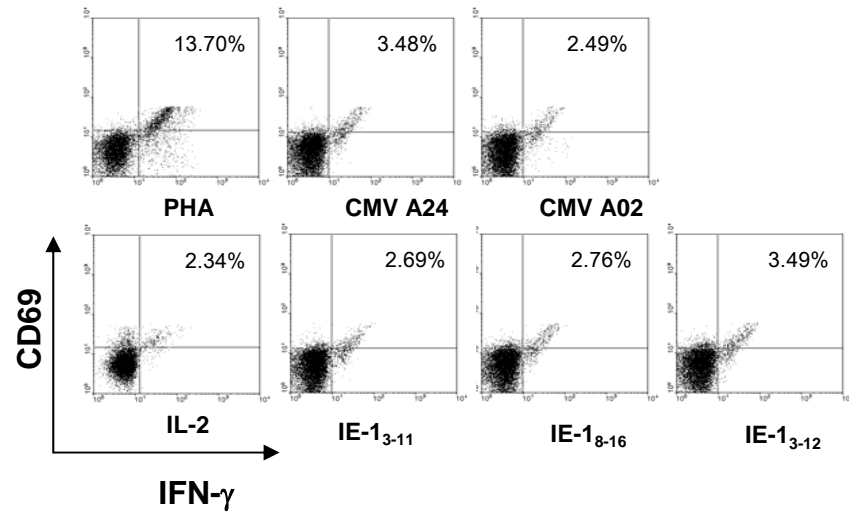

Supplement: MOESM5 [file 9576352]
